# Supplementary material
Source: Springer Nature journal article supplement (https://www.springermedizin.de/resource/supplementary/12958_2013_1188_MOESM6_ESM.pdf/9566960)

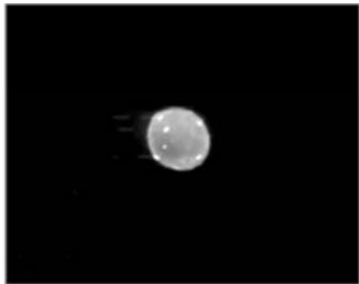

**(A)**

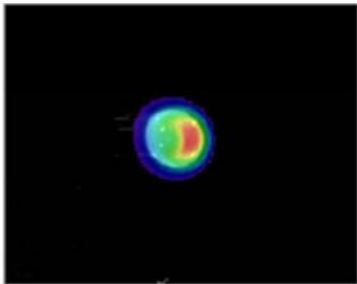

**(B)**

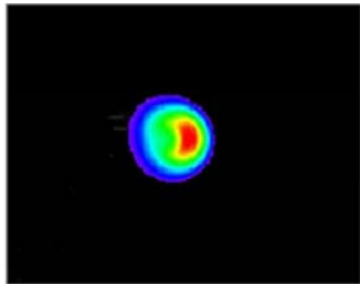

**(C)**

Supplement: MOESM6 [file 9566960]
